# Supplementary material for: Preparation of magnetic zeolitic imidazolate framework-8 for magnetic solid-phase extraction of strobilurin fungicides from environmental water samples
Source: Royal Society of Chemistry journal article supplement (doi:10.1039/d1ay00645b), 2021-01-01
Supplement: d1ay00645b1.pdf [file d1ay00645b1.pdf]

## Supporting Information

### Preparation of magnetic zeolitic imidazolate framework-8 for magnetic solid-phase extraction of strobilurin fungicides from environmental water samples

Xinyi Li<sup>\*a</sup>, Bingzhi Li<sup>\*a</sup>, Min Chen<sup>b</sup>, Mengmeng Yan<sup>c</sup>, Xiaolin Cao<sup>\*a</sup>, Jungang Yin<sup>a</sup>,  
Ziping Zhang<sup>a</sup>

[a] College of Life Science, Yantai University, Yantai 264005, P. R. China

[b] Yantai Academy of Agricultural Sciences, Yantai, 265500, P. R. China

[c] Institution of Quality Standard Testing Technology for Agro-Product, Shandong  
Academy of Agricultural Science, Jinan 250100, P. R. China

#### Synthesis of Fe<sub>3</sub>O<sub>4</sub> nanoparticles

The magnetic Fe<sub>3</sub>O<sub>4</sub> microspheres were synthesized using a reported chemical co-precipitation method.<sup>1-3</sup> Briefly, FeCl<sub>3</sub>·6H<sub>2</sub>O (2.35 g) and FeCl<sub>2</sub>·6H<sub>2</sub>O (0.9 g) were dissolved in ultrapure water (10 mL), respectively. FeCl<sub>3</sub> and FeCl<sub>2</sub> water solutions were added in 250 mL round-bottom flask containing 80 mL ultrapure water. The flask was stirred vigorously in a water bath at 70 °C. Subsequently, 10 mL 25% ammonia water was added in flask. The obtained black solution was stirred vigorously and maintained at 80 °C for 0.5 h, and allowed to cool to room temperature. Finally, the magnetic Fe<sub>3</sub>O<sub>4</sub> microspheres were washed with ethanol and three times with the help of magnet, and then dried at 60 °C for 12 h.

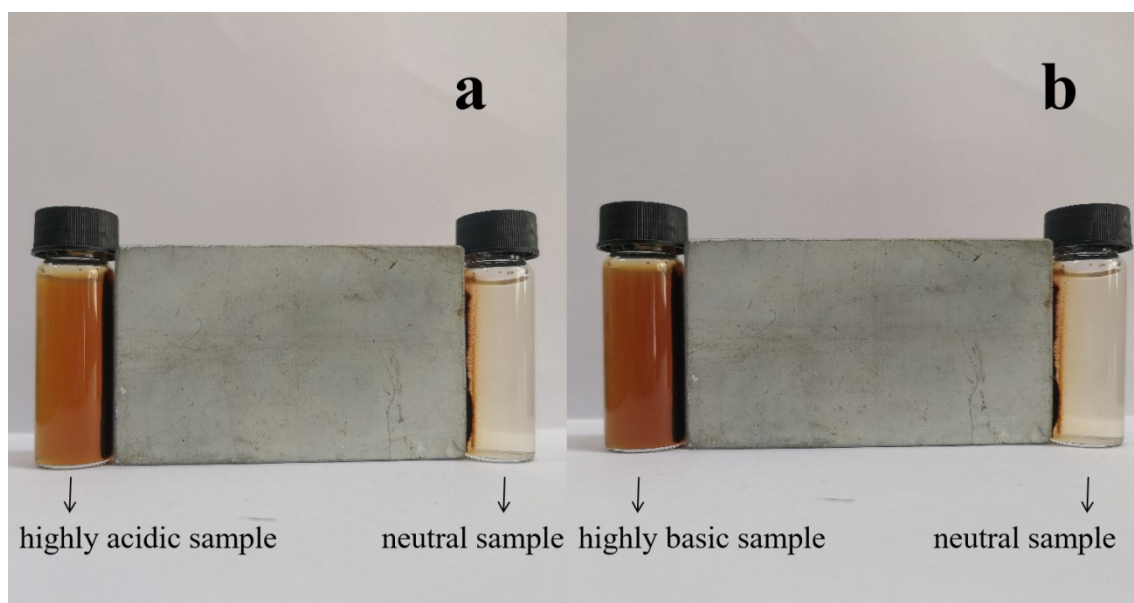

Fig. S1. The separation effect of  $\text{Fe}_3\text{O}_4/\text{ZIF-8}$  in water sample

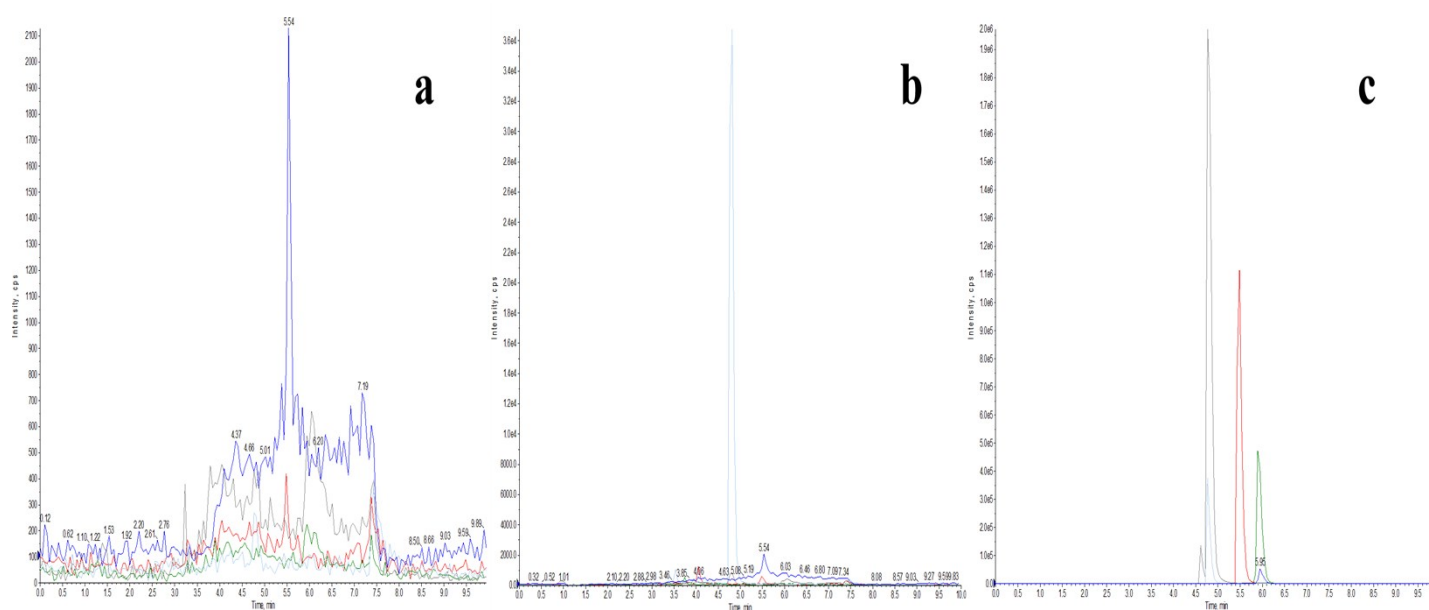

Fig. S2. The extracted ion chromatograms from blank river water sample (a), detected lake sample (b), and the tap water sample spiked at 50 ng/mL (c)

**References:**

- [1] Xiaolin Cao, Guangyuan Liu, Yongxin She , Zejun Jiang, Preparation of Magnetic Metal Organic Framework Composites for the Extraction of Neonicotinoid Insecticides from Environmental Water Samples, *Rsc. Adv.* 14 (2017) 27-48.
- [2] Mohammad Hossein Mashhadizadeh, Mitra Amoli-Diva, Kamyar Pourghazi. Magnetic nanoparticles solid phase extraction for determination of ochratoxin A in cereals using high-performance liquid chromatography with fluorescence detection, *J. Chromatogr. A.* 1320 (2013) 17-26.
- [3] Mohammad Hossein Mashhadizadeh, Zahra Karami. Solid phase extraction of trace amounts of Ag, Cd, Cu, and Zn in environmental samples using magnetic nanoparticles coated by 3-(trimethoxysilyl)-1-propanol and modified with 2-amino-5-mercapto-1,3,4-thiadiazole and their determination by ICP-OES, *J. Hazard. Mater.* 190 (2011) 1023-1029.
